# Supplementary material for: Comparison of monocyte human leukocyte antigen-DR expression and stimulated tumor necrosis factor alpha production as outcome predictors in severe sepsis: a prospective observational study
Source: PubMed Central journal article supplement (PMC5072304; doi:10.1186/s13054-016-1505-0), 2016-10-20
Supplement: 13054_2016_1505_MOESM4_ESM.pdf [file 13054_2016_1505_MOESM4_ESM.pdf]

**Additional File 4.** Characteristics of secondary infections

---

|                                                  | <b>Patients with secondary infections, n = 22</b> |
|--------------------------------------------------|---------------------------------------------------|
| Time to secondary infection (days), median (IQR) | 9.4 (5.5, 19.0)                                   |
| Site of secondary infection, n (%)               |                                                   |
| Lung                                             | 9 (40.9)                                          |
| Abdomen                                          | 7 (31.8)                                          |
| Urinary tract                                    | 1 (4.5)                                           |
| Blood                                            | 1 (4.5)                                           |
| Wound                                            | 1 (4.5)                                           |
| Other/Unknown                                    | 3 (13.6)                                          |
| Culture positive, n (%)                          | 9 (40.9)                                          |
| Organism, n (%)                                  |                                                   |
| Gram-negative                                    | 4 (18.2)                                          |
| Gram-positive                                    | 1 (4.5)                                           |
| Mixed                                            | 1 (4.5)                                           |
| Fungal                                           | 1 (4.5)                                           |
| Viral                                            | 2 (9.1)                                           |

---

IQR, 25%, 75% interquartile range
