# Supplementary material for: Comparison of monocyte human leukocyte antigen-DR expression and stimulated tumor necrosis factor alpha production as outcome predictors in severe sepsis: a prospective observational study
Source: Springer Nature journal article supplement (doi:10.1186/s13054-016-1505-0), 2016-10-13
Supplement: MOESM2 [file 10918248]

**Additional File 2. Blood sampling details**

|                                           | 28-Day survivors, n = 58 |                   |                   | 28-Day non-survivors, n =25 |                        |                   |
|-------------------------------------------|--------------------------|-------------------|-------------------|-----------------------------|------------------------|-------------------|
|                                           | Sample A                 | Sample B          | Sample C          | Sample A                    | Sample B               | Sample C          |
| Samples collected, n                      | 57                       | 48                | 21                | 23                          | 18                     | 10                |
| Days after sepsis diagnosis, median (IQR) | 1.41 (1.04, 1.66)        | 2.61 (2.38, 3.16) | 6.69 (5.82, 7.23) | 1.30 (0.94, 1.60)           | 2.64 (2.28, 3.65)      | 6.26 (5.62, 7.37) |
| Reason for missing samples, n             |                          |                   |                   |                             |                        |                   |
| Discharged from ICU                       | 0                        | 10                | 37                | 0                           | 2                      | 5                 |
| Death prior to collection                 | 0                        | 0                 | 0                 | 2                           | 5                      | 10                |
| Unable to draw blood                      | 1                        | 0                 | 0                 | 0                           | 0                      | 0                 |
| HLA-DR expression tested, n (%)           | 51 (87.9)                | 43 (74.1)         | 18 (31.0)         | 23 (92.0) <sup>a</sup>      | 17 (68.8) <sup>a</sup> | 10 (40.0)         |
| TNF- $\alpha$ production tested, n (%)    | 50 (86.2)                | 40 (69.0)         | 17 (29.3)         | 23 (92.0) <sup>a</sup>      | 17 (68.0) <sup>a</sup> | 10 (40.0)         |

<sup>a</sup>Immunological data from one non-survivor was excluded from analysis due to being a statistical outlier. IQR, 25%, 75%

interquartile range; ICU, intensive care unit; HLA-DR, human leukocyte antigen-DR; TNF- $\alpha$ , tumor necrosis factor-alpha
