# Supplementary material for: Comparison of monocyte human leukocyte antigen-DR expression and stimulated tumor necrosis factor alpha production as outcome predictors in severe sepsis: a prospective observational study
Source: Springer Nature journal article supplement (doi:10.1186/s13054-016-1505-0), 2016-10-13
Supplement: MOESM3 [file 10918248]

**Additional File 3.** Leukocyte counts in survivors and non-survivors for the first seven days following sepsis diagnosis

|                                               | Day 1                       | Day 2            | Day 3            | Day 4            | Day 5            | Day 6             | Day 7             |
|-----------------------------------------------|-----------------------------|------------------|------------------|------------------|------------------|-------------------|-------------------|
|                                               | <b>28-Day Survivors</b>     |                  |                  |                  |                  |                   |                   |
| No. of samples                                | 57                          | 50               | 53               | 49               | 48               | 32                | 35                |
| WBC, (cells/ $\mu$ L x $10^3$ ), median (IQR) | 11.9 (8.8, 17.5)            | 10.0 (6.5, 14.5) | 8.2 (5.8, 13.5)  | 8.8 (6.4, 10.7)  | 9.5 (6.0, 12.8)  | 9.4 (5.6, 14.9)   | 8.7 (6.2, 12.3)   |
| ANC, (cells/ $\mu$ L x $10^3$ ), median (IQR) | 9.6 (7.1, 15.4)             | 8.0 (5.2, 11.4)  | 6.9 (4.2, 10.2)  | 6.5 (4.2, 7.9)   | 6.7 (5.2, 9.9)   | 7.8 (4.1, 12.9)   | 7.1 (4.3, 10.5)   |
| ALC, (cells/ $\mu$ L x $10^3$ ), median (IQR) | 1.0 (0.5, 1.6)              | 0.9 (0.6, 1.7)   | 1.0 (0.6, 1.4)   | 1.1 (0.8, 1.4)   | 1.2 (0.7, 1.7)   | 1.1 (0.7, 1.6)    | 1.2 (0.9, 1.5)    |
| AMC, (cells/ $\mu$ L x $10^3$ ), median (IQR) | 0.6 (0.5, 1.0)              | 0.5 (0.4, 0.8)   | 0.6 (0.5, 0.9)   | 0.6 (0.4, 0.7)   | 0.6 (0.5, 0.9)   | 0.8 (0.5, 0.9)    | 0.6 (0.4, 0.9)    |
|                                               | <b>28-Day Non-Survivors</b> |                  |                  |                  |                  |                   |                   |
| No. of samples                                | 25                          | 23               | 20               | 18               | 15               | 15                | 13                |
| WBC, (cells/ $\mu$ L x $10^3$ ), median (IQR) | 14.3 (11.9, 21.1)           | 14.8 (8.6, 20.5) | 14.0 (9.6, 19.3) | 13.2 (9.5, 20.4) | 13.9 (7.6, 23.3) | 14.3 (10.0, 20.3) | 15.9 (10.8, 21.0) |
| ANC, (cells/ $\mu$ L x $10^3$ ), median (IQR) | 12.9 (10.3, 20.8)           | 12.1 (6.2, 16.0) | 10.9 (7.5, 16.9) | 11.9 (7.4, 18.0) | 11.5 (6.8, 19.8) | 13.4 (8.6, 18.4)  | 15.6 (8.3, 19.6)  |
| ALC, (cells/ $\mu$ L x $10^3$ ), median (IQR) | 1.0 (0.6, 1.4)              | 1.0 (0.5, 1.4)   | 1.0 (0.7, 1.5)   | 0.9 (0.7, 1.3)   | 1.1 (0.6, 1.4)   | 1.1 (0.5, 1.4)    | 1.2 (0.9, 1.4)    |
| AMC, (cells/ $\mu$ L x $10^3$ ), median (IQR) | 0.9 (0.6, 1.2)              | 0.8 (0.3, 1.3)   | 0.9 (0.5, 1.3)   | 0.8 (0.7, 1.3)   | 0.6 (0.4, 1.1)   | 0.9 (0.7, 1.4)    | 0.9 (0.6, 1.6)    |

WBC, white blood cell; IQR, 25%, 75% interquartile range; ANC, absolute neutrophil count; ALC, absolute lymphocyte

count; AMC, absolute monocyte count.
